# Supplementary material for: Morphological and Transcriptional Responses to CRISPRi Knockdown of Essential Genes in Escherichia coli
Source: PubMed Central journal article supplement (PMC8510551; doi:10.1128/mbio.02561-21), 2021-10-12

**A**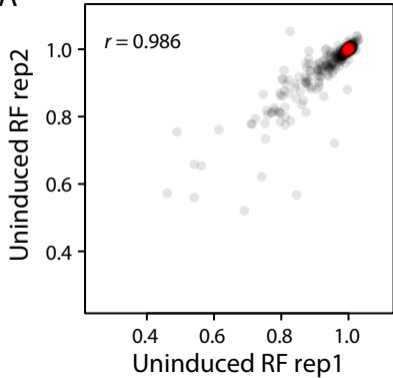**B**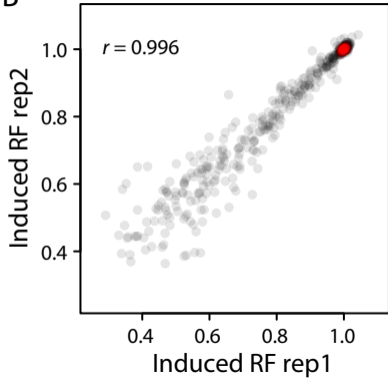

Supplement: mbio.02561-21-sf002.pdf [file mbio.02561-21-sf002.pdf]
